# Supplementary material
Source: PubMed Central journal article supplement (PMC5214102)
Supplement: NIHMS823494-supplement-Supplementary_Table_1.pdf [file NIHMS823494-supplement-Supplementary_Table_1.pdf]

**Supplementary Table 1.** Composition of standard chow diet, HFD and HFD+walnuts.

|              | Chow<br>(3.0 kcal/g) | HFD<br>(4.7 kcal/g) | HFD+walnuts<br>(4.6 kcal/g) |
|--------------|----------------------|---------------------|-----------------------------|
|              | % kcal from          | % kcal from         | % kcal from                 |
| Protein      | 24                   | 20                  | 20                          |
| Carbohydrate | 62                   | 35                  | 35                          |
| Fat          | 14                   | 45                  | 45                          |

  

| Ingredient          | g     | kcal | g     | kcal |
|---------------------|-------|------|-------|------|
| Casein              | 200   | 800  | 181   | 742  |
| L-Cystine           | 3     | 12   | 3     | 12   |
| Corn Starch         | 246.3 | 985  | 246.3 | 985  |
| Maltodextrin        | 100   | 400  | 100   | 400  |
| Cellulose           | 50    | 0    | 50    | 0    |
| Soybean Oil         | 25    | 225  | 25    | 225  |
| Lard                | 177.5 | 1598 | 96    | 864  |
| Mineral mix         | 10    | 0    | 10    | 0    |
| DiCalcium Phosphate | 13    | 0    | 13    | 0    |
| Calcium Carbonate   | 5.5   | 0    | 5.5   | 0    |
| Potassium Citrate   | 16.5  | 0    | 16.5  | 0    |
| Vitamin Mix         | 10    | 40   | 10    | 40   |
| Choline Bitartrate  | 2     | 0    | 2     | 0    |
| Walnuts             | 0     | 0    | 125   | 810  |
| Total               | 858.8 | 4060 | 883.3 | 4060 |
